# Supplementary material
Source: PubMed Central journal article supplement (PMC3167680)
Supplement: supp_kwr064_kwr064_Web_Tables.pdf [file supp_kwr064_kwr064_Web_Tables.pdf]

Web Table 1. Synergy Index (S) Values and 95% Confidence Intervals (CI) as a Test of Departures from Additivity by Race, Smoking, Parity, Age, or Height on Associations Between Gestational Weight Gain (GWG) and Adverse Pregnancy Outcomes (n=17,782), Magee-Womens Hospital Deliveries, Pittsburgh, Pennsylvania (2003-2008).

| Association              | Potential effect modifier |                  |            |                 |             |                  |           |          |               |                  |
|--------------------------|---------------------------|------------------|------------|-----------------|-------------|------------------|-----------|----------|---------------|------------------|
|                          | Smoking                   |                  | Black race |                 | Primiparity |                  | Young age |          | Short stature |                  |
|                          | S                         | 95% CI           | S          | 95% CI          | S           | 95% CI           | S         | 95% CI   | S             | 95% CI           |
| Low GWG - SGA            | <b>1.2</b>                | <b>1.1, 1.4</b>  | 1.2        | 1.0, 1.4        | <b>1.2</b>  | <b>1.03, 1.4</b> | 1.2       | 0.6, 1.8 | 1.2           | 0.9, 1.5         |
| Low GWG - sPTB           | <b>1.6</b>                | <b>1.2, 1.9</b>  | 1.8        | 0.5, 3.1        | 0.5         | 0, 1.0           | 0.3       | 0, 1.6   | 1.0           | 0.1, 1.9         |
| Low GWG - iPTB           | 1.6                       | 1.0, 2.1         | 2.1        | 0.8, 3.5        | 1.0         | 0.3, 1.7         | 0.4       | 0, 1.9   | 1.2           | 0, 2.9           |
| High GWG - LGA           | <b>0.3</b>                | <b>0.04, 0.6</b> | <b>0.6</b> | <b>0.3, 0.9</b> | <b>0.5</b>  | <b>0.3, 0.6</b>  | 1.1       | 0.5, 1.7 | <b>0.3</b>    | <b>0.01, 0.7</b> |
| High GWG - unplanned C/S | 1.2                       | 0.6, 1.8         | 0.9        | 0.5, 1.3        | <b>1.5</b>  | <b>1.2, 1.8</b>  | 0.6       | 0, 3.2   | 1.2           | 0.8, 1.6         |

C/S, cesarean delivery; GWG, gestational weight gain; iPTB, indicated preterm birth, LGA, large-for-gestational age; SGA, small-for-gestational age; sPTB, spontaneous preterm birth.

A synergy index of 1.0 implies no interaction (perfect additivity), <1 indicates antagonism, and >1 indicates synergy (24).

Bolded entries are those with confidence intervals that do not overlap 1.0.

Web Table 2. Risk Difference for at Least One Adverse Birth Outcome\* Comparing Gestational Weight Gain at the 2009 Institute of Medicine Recommended Guidelines with Gestational Weight Gain at the Nadir of Subgroup Risk Curves (n=17,782), Magee-Womens Hospital Deliveries, Pittsburgh, Pennsylvania (2003-2008).

|             | At 2009 IOM guidelines |          |       | At nadir of risk curve |          |       | Unadjusted RD | 95% CI         | Adjusted** RD | 95% CI        |
|-------------|------------------------|----------|-------|------------------------|----------|-------|---------------|----------------|---------------|---------------|
|             | % of IOM               | GWG (kg) | Risk  | % of IOM               | GWG (kg) | Risk  |               |                |               |               |
| Smokers     | 100%                   | 13.3     | 0.401 | 147%                   | 19.6     | 0.359 | -0.041        | -0.092, 0.010  | -0.032        | -0.083, 0.020 |
| Non-smokers | 100%                   | 13.3     | 0.267 | 100%                   | 13.3     | 0.267 | 0             |                | 0             |               |
| Black women | 100%                   | 13.3     | 0.377 | 147%                   | 19.6     | 0.328 | -0.049        | -0.095, -0.003 | -0.044        | -0.090, 0.002 |
| White women | 100%                   | 13.3     | 0.265 | 100%                   | 13.3     | 0.265 | 0             |                | 0             |               |
| Primiparous | 100%                   | 13.3     | 0.328 | 110%                   | 14.6     | 0.324 | -0.004        | -0.008, -0.001 | -0.003        | -0.007, 0.001 |
| Multiparous | 100%                   | 13.3     | 0.242 | 102%                   | 13.4     | 0.242 | 0.001         | -0.001, 0.001  | 0.001         | -0.001, 0.001 |
| 13-19 years | 100%                   | 13.3     | 0.350 | 137%                   | 18.2     | 0.311 | -0.037        | -0.091, 0.018  | -0.032        | -0.088, 0.023 |
| ≥20 years   | 100%                   | 13.3     | 0.276 | 102%                   | 13.6     | 0.276 | 0.001         | -0.001, 0.001  | 0.001         | -0.001, 0.001 |
| <157 cm     | 100%                   | 13.3     | 0.393 | 112%                   | 14.9     | 0.385 | -0.004        | -0.018, 0.010  | -0.006        | -0.021, 0.008 |
| ≥157 cm     | 100%                   | 13.3     | 0.265 | 102%                   | 13.6     | 0.265 | 0.001         | -0.001, 0.001  | 0.001         | -0.001, 0.001 |

GWG, gestational weight gain; IOM, Institute of Medicine 2009 guidelines (1); RD, risk difference; CI, confidence interval

\* Composite outcome of any one of following adverse birth outcomes: small-for-gestational-age birth, large-for-gestational-age birth, indicated preterm birth, spontaneous preterm birth, unplanned Cesarean delivery.

\*\*Adjusted for maternal race/ethnicity, education, age, height, parity, smoking, provider type, marital status, and delivery year. The stratifying variable was not included in the model.
